# Supplementary material for: Nedaplatin/Peganum harmala Alkaloids Co-Loaded Electrospun, Implantable Nanofibers: A Chemopreventive Nano-Delivery System for Treating and Preventing Breast Cancer Recurrence after Tumorectomy
Source: MDPI journal article supplement (doi:10.3390/pharmaceutics15102367), 2023-09-22
Supplement: s1 [file s1]

## Supplementary Materials

# Nedaplatin/*Peganum harmala* Alkaloids Co-Loaded Electrospun, Implantable Nanofibers: A Chemopreventive Nano-Delivery System for Treating and Preventing Breast Cancer Recurrence after Tumorectomy

Nada K. Sedky <sup>1,†</sup>, Kholoud K. Arafa <sup>2,†</sup>, Manal M. M. Abdelhady <sup>3</sup>, Marwa Y. Issa <sup>4</sup>,  
Nour M. Abdel-Kader <sup>1,5</sup>, Noha Khalil Mahdy <sup>6</sup>, Fatma A. Mokhtar <sup>7</sup>, Mohammad Y. Alfaifi <sup>8</sup>  
and Sherif Ashraf Fahmy <sup>9,\*</sup>

<sup>1</sup> Department of Biochemistry, School of Life and Medical Sciences, University of Hertfordshire Hosted by Global Academic Foundation, R5 New Garden City, New Administrative Capital, Cairo 11835, Egypt

<sup>2</sup> Drug Design and Discovery Lab, Zewail City for Science, Technology and Innovation, Cairo 12578, Egypt

<sup>3</sup> Clinical Pharmacy Department, Faculty of Pharmacy, Badr University, Cairo 11829, Egypt

<sup>4</sup> Department of Pharmacognosy, Faculty of Pharmacy, Cairo University, Kasr El-Aini Street, Cairo 11562, Egypt

<sup>5</sup> Department of Biochemistry, Faculty of Science, Ain Shams University, Cairo 11566, Egypt

<sup>6</sup> Department of Pharmaceutics and Industrial Pharmacy, Faculty of Pharmacy, Cairo University, Kasr El-Aini Street, Cairo 11562, Egypt

<sup>7</sup> Department of Pharmacognosy, Faculty of Pharmacy, El Saleheya El Gadida University, El Saleheya El Gadida 44813, Egypt

<sup>8</sup> Biology Department, Faculty of Science, King Khalid University, Abha 9004, Saudi Arabia

<sup>9</sup> Department of Chemistry, School of Life and Medical Sciences, University of Hertfordshire Hosted by Global Academic Foundation, R5 New Garden City, New Capital, Cairo 11835, Egypt

\* Correspondence: sheriffahmy@aucegypt.edu; Tel.: +20-1222613344

† These authors contributed equally to this work.

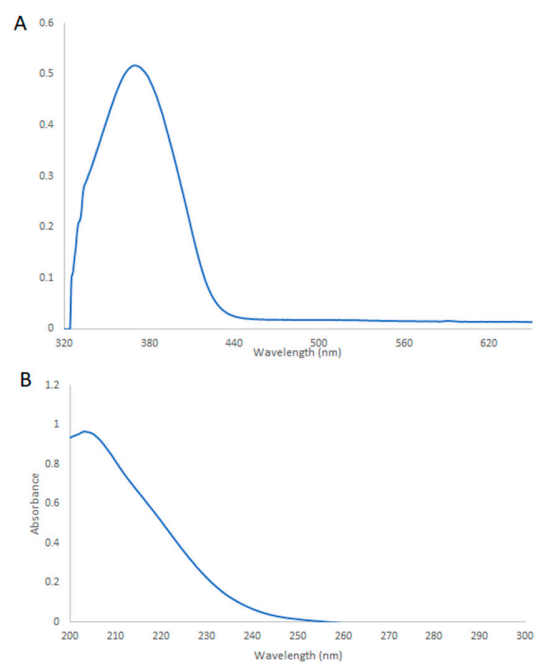

**Figure S1.** UV Spectra of (A) L and (B) N

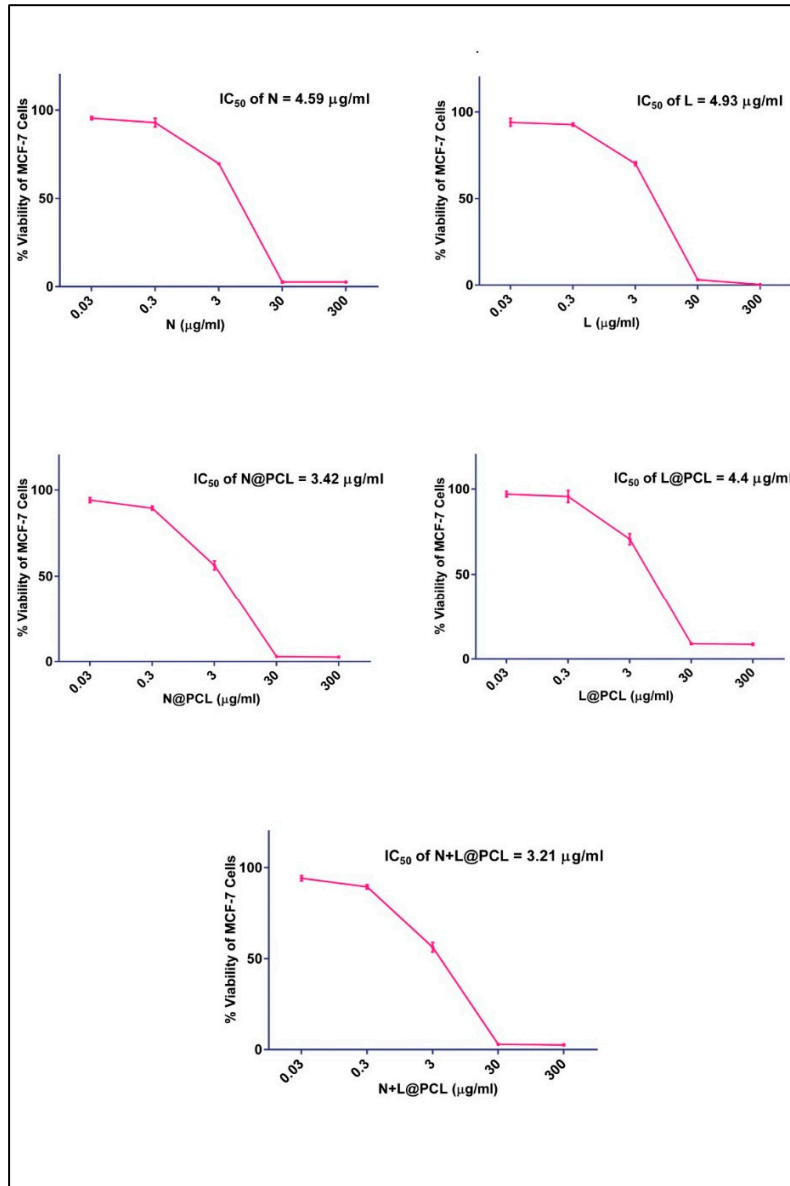

**Figure S2.** Dose-response curves show the % viability of MCF-7 after exposure to the test specimens.

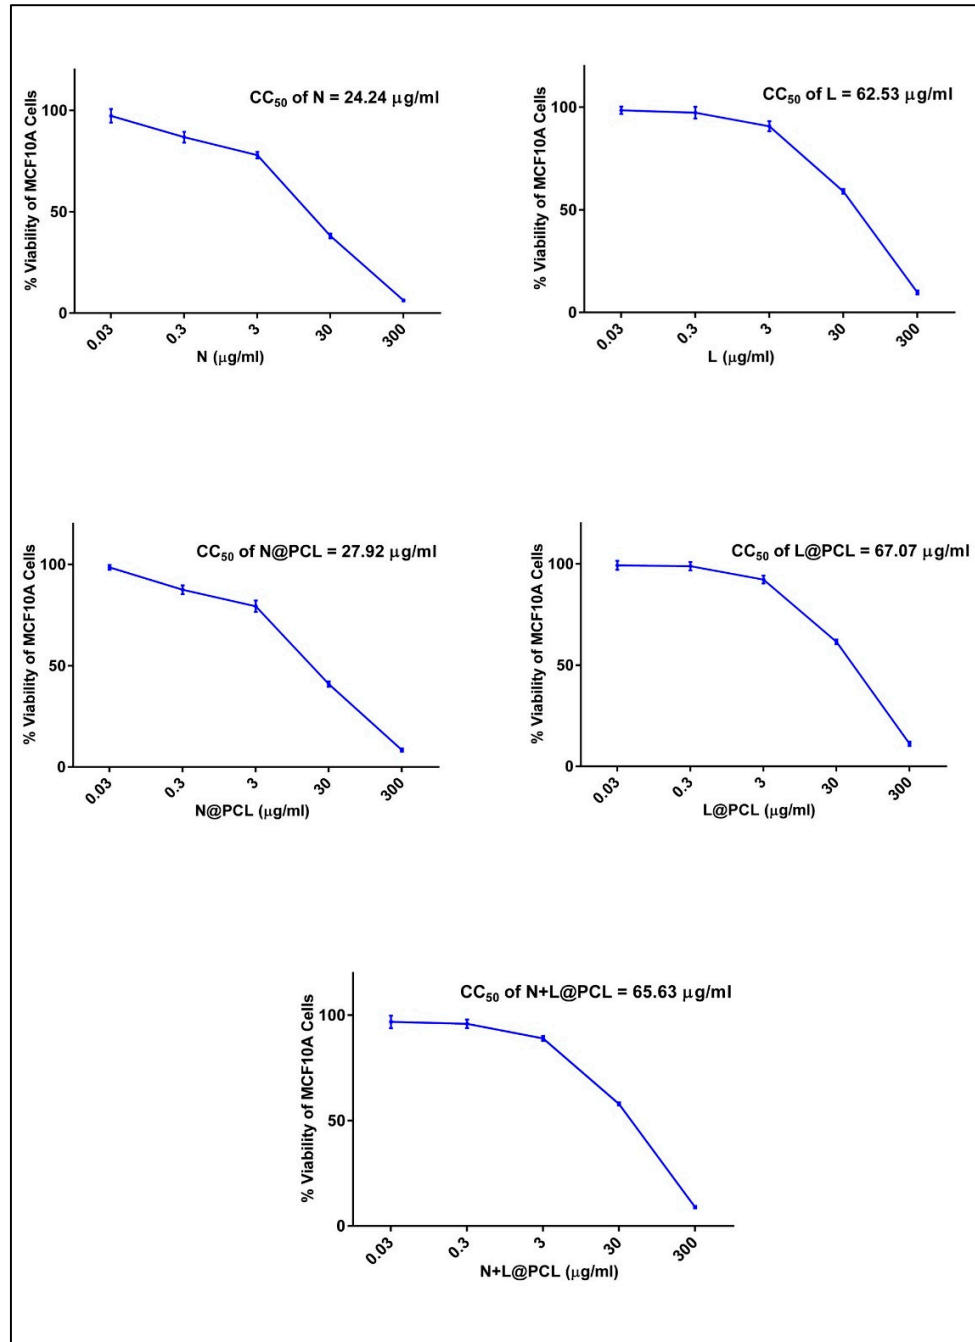

**Figure S3.** Dose-response curves show the % viability of normal breast epithelial cell lines (MCF10A) after exposure to the test specimens.
